# Supplementary material for: Multitarget Tracking with Spatial Nonmaximum Suppressed Sensor Selection
Source: Hindawi journal article supplement (doi:10.1155/2015/148081), 2015-01-01
Supplement: f1 [file 148081.f1.zip]

Archive with 4 entries (3 files):
- 148081.f1/
- 148081.f1/description.docx
- 148081.f1/track_indHIG.avi
- 148081.f1/track_sumHIG.avi
