# Supplementary material for: Multitarget Tracking with Spatial Nonmaximum Suppressed Sensor Selection
Source: Hindawi journal article supplement (doi:10.1155/2015/148081), 2015-01-01
Supplement: f1 [file 148081.f1.zip › 148081.f1/description.docx]

Videos are simulation trial runs for a planar multi-target tracking scenario in a static sensor network, in which 9 x 9 sensors laid out uniformly over a square of size [-1000m, 1000m] x [-1000m, 1000m] divided into 200m x 200m blocks. Our goal is to estimate the number of targets as well as their positions using Spatial Non-maximum Suppressed sensor selection. Two distinguished implementations are presented. Blue dots stand for sensors that cannot detect any targets, and red o are sensors that can detect at least one target. Blue line and o are used for target track and current position, black ❑ for selected sensor, red * for target estimation.
